# Supplementary material for: Oral Microbial Profile Analysis in Patients with Oral and Pharyngeal Cancer Reveals That Tumoral Fusobacterium nucleatum Promotes Oral Cancer Progression by Activating YAP
Source: MDPI journal article supplement (doi:10.3390/microorganisms11122957), 2023-12-10
Supplement: s1 [file s1]

# Supplemental Figure. S1

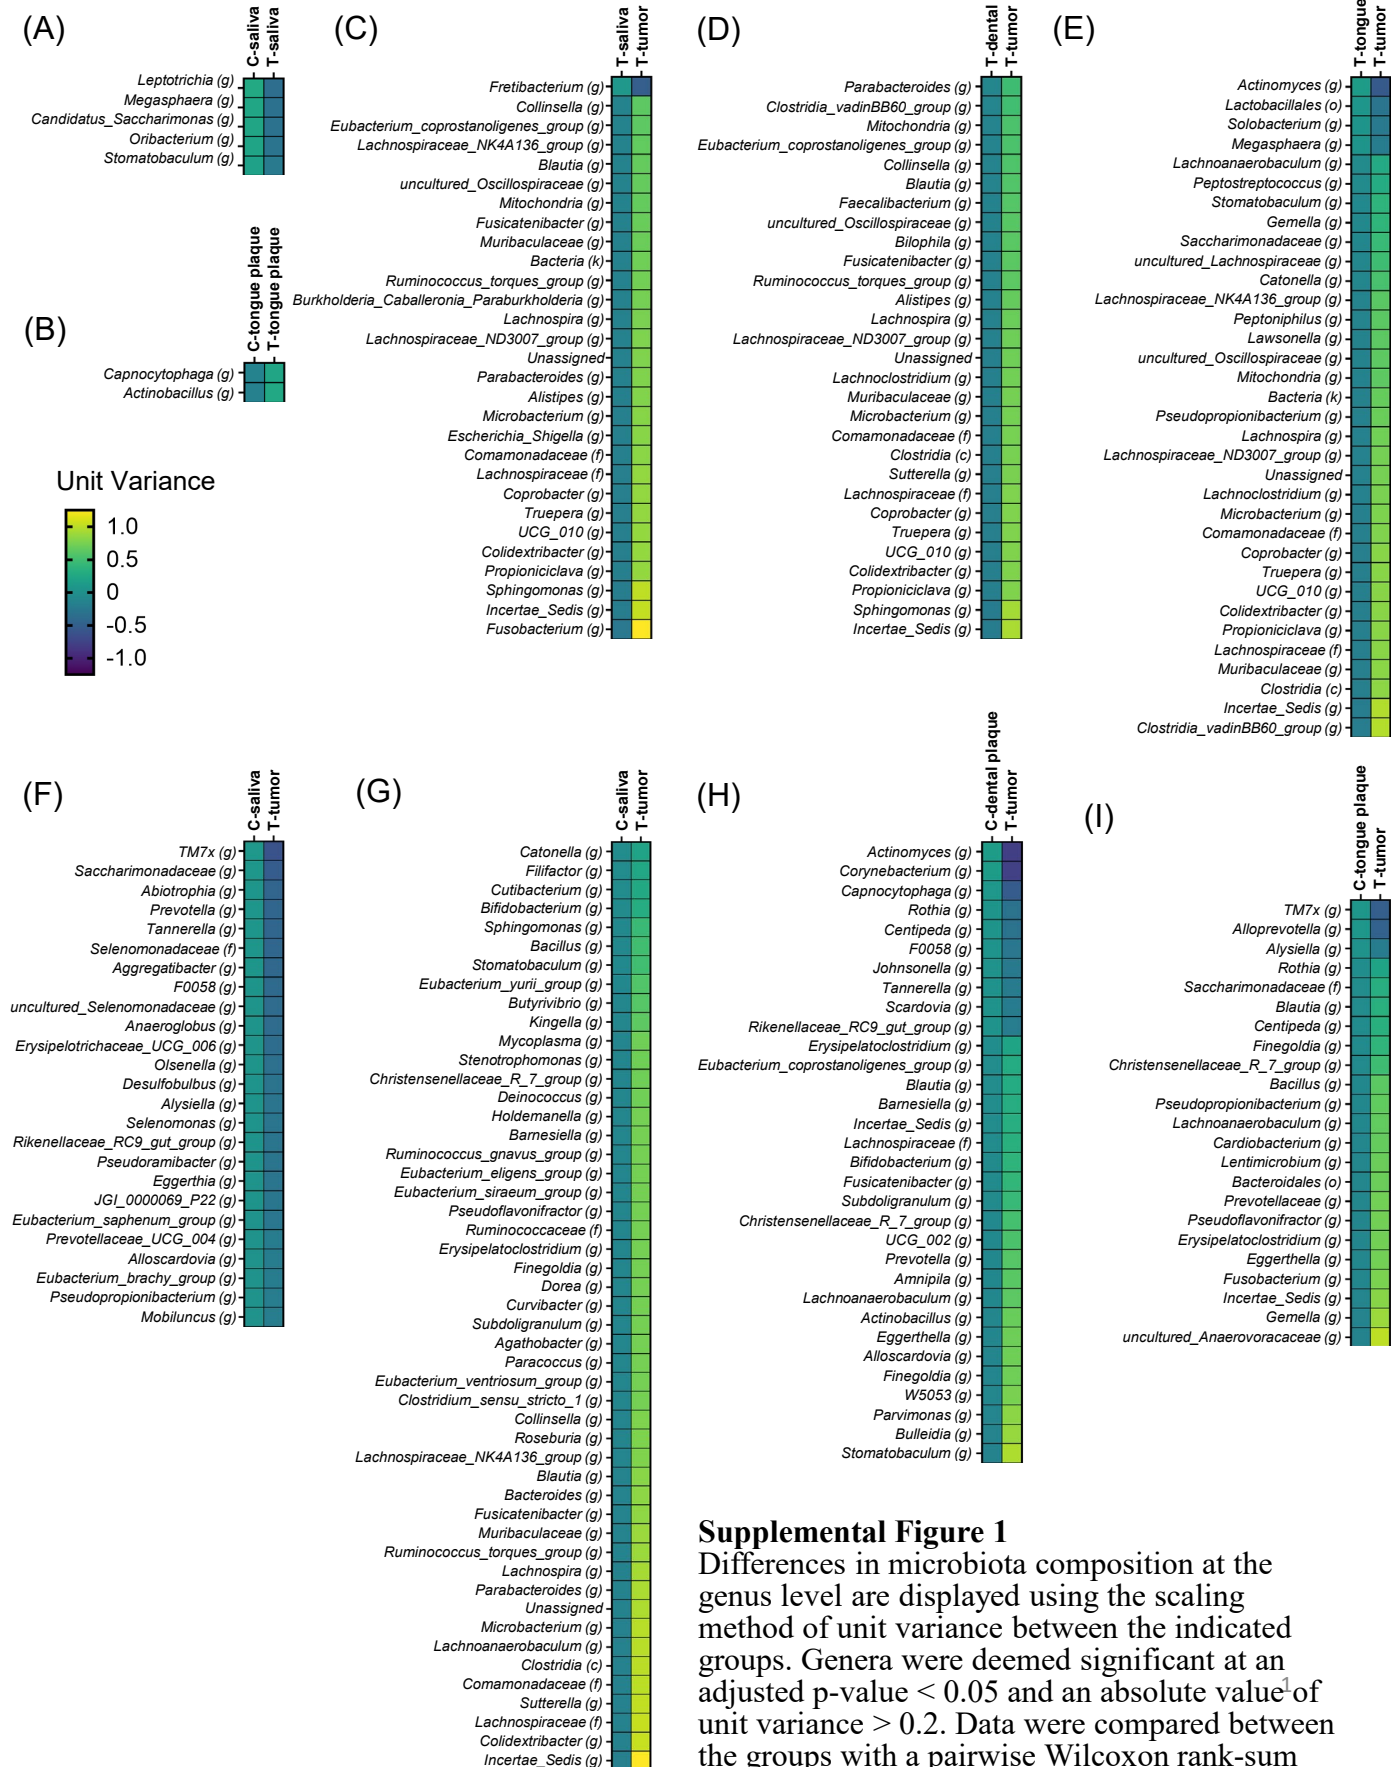

# Supplemental Figure. S2

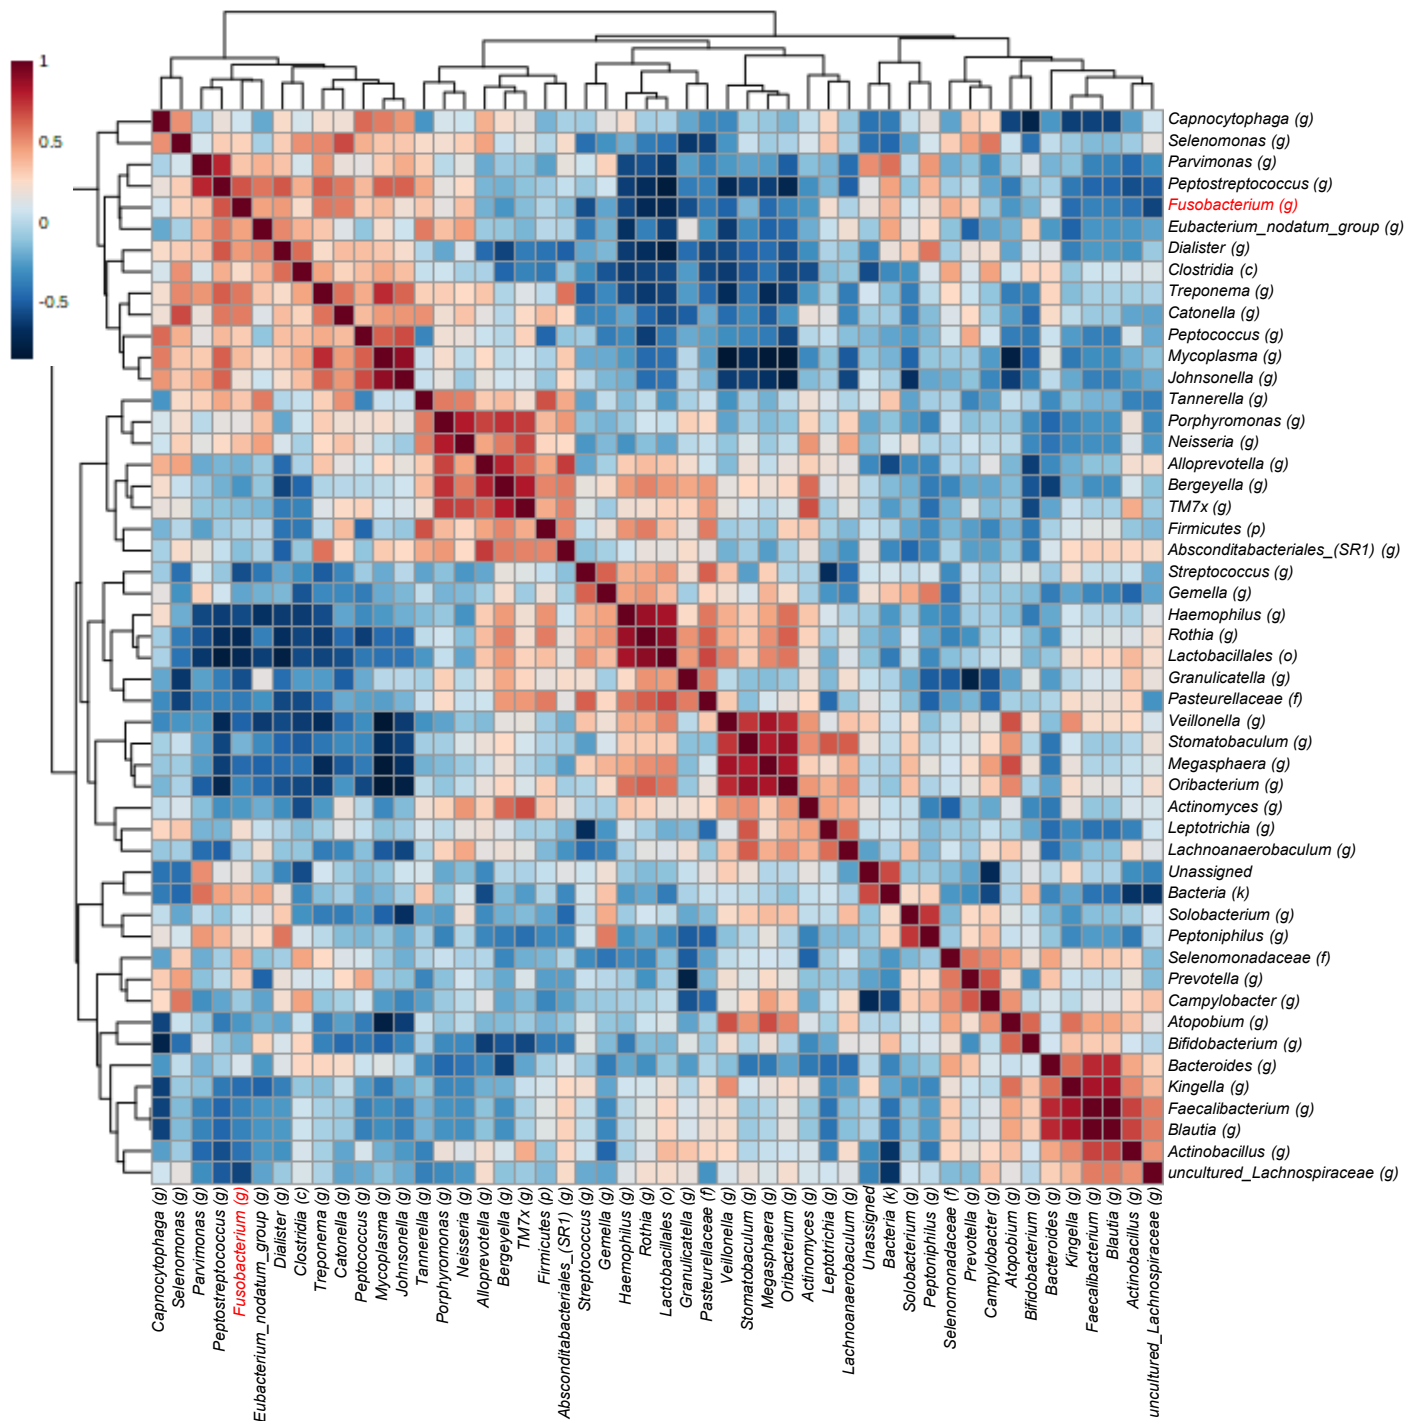

## Supplemental Figure 2

Co-occurrence analysis of the top 50 bacterial genera in tumor tissues from oral cancer patients is depicted using Spearman's rank correlation coefficient in a heat map.

# Supplemental Figure. S3

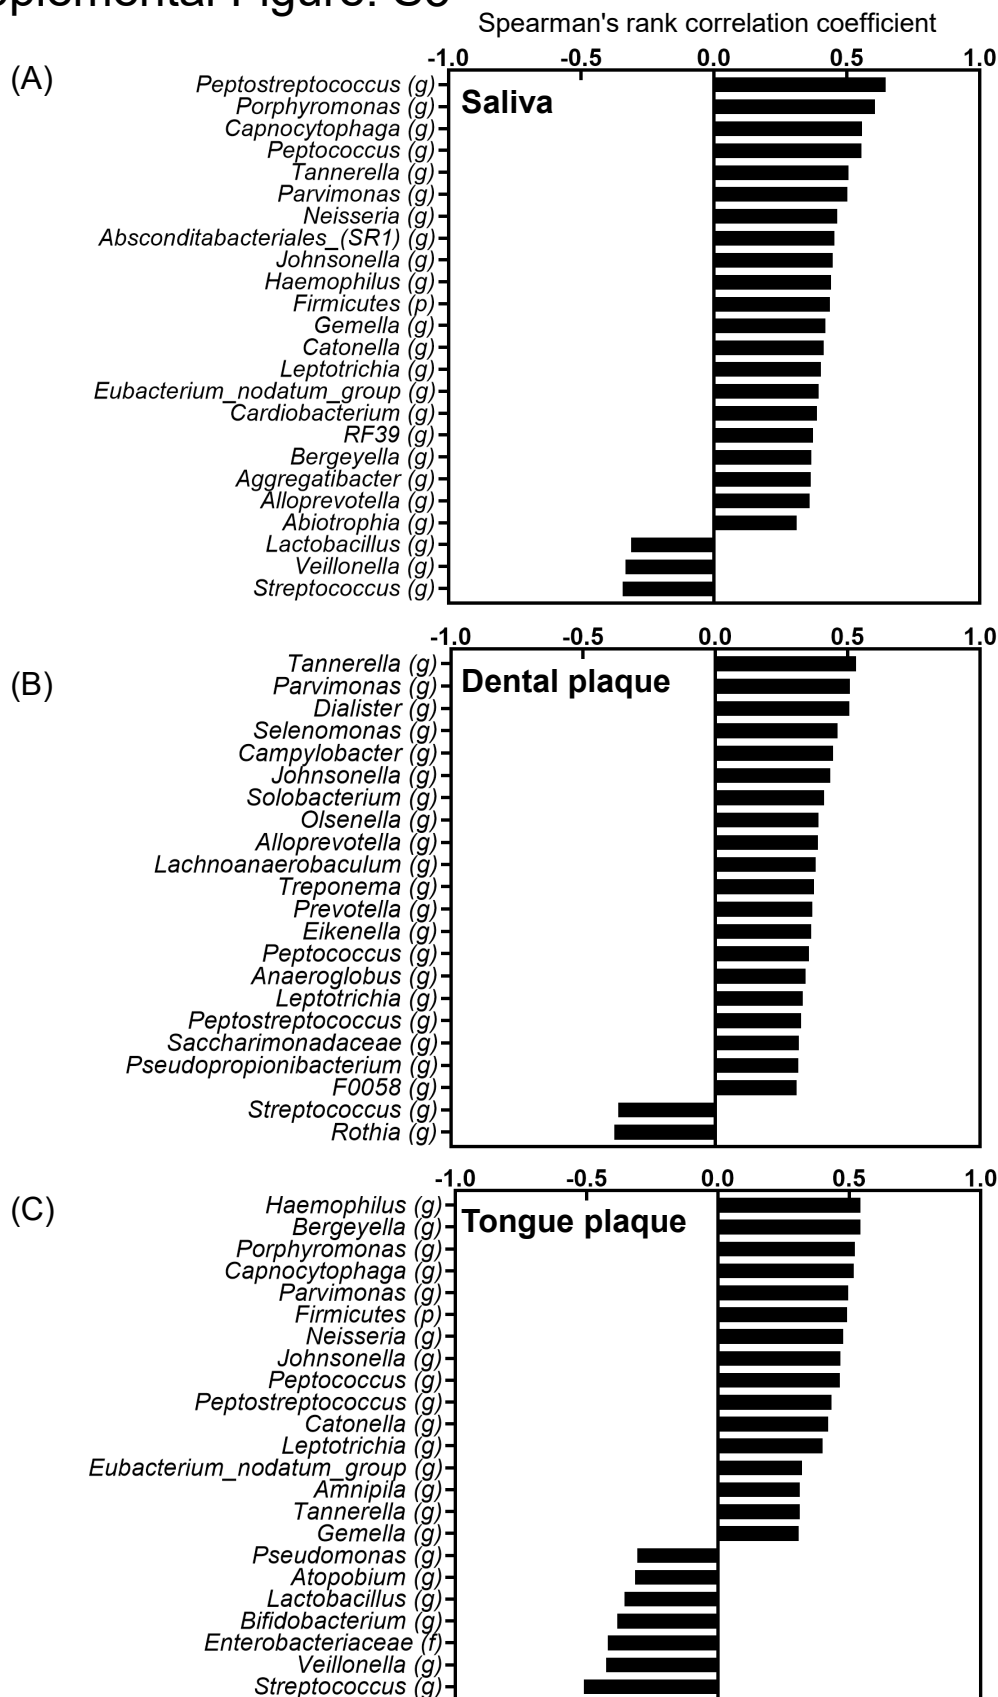

**Supplemental Figure 3**

Correlation between the abundance of *Fusobacterium* and other bacterial genera in saliva (A), dental plaque (B), and tongue plaque (C) between the control and oral cancer patient groups is showcased using Spearman's rank correlation coefficient in bar plots.

# Supplemental Figure. S4

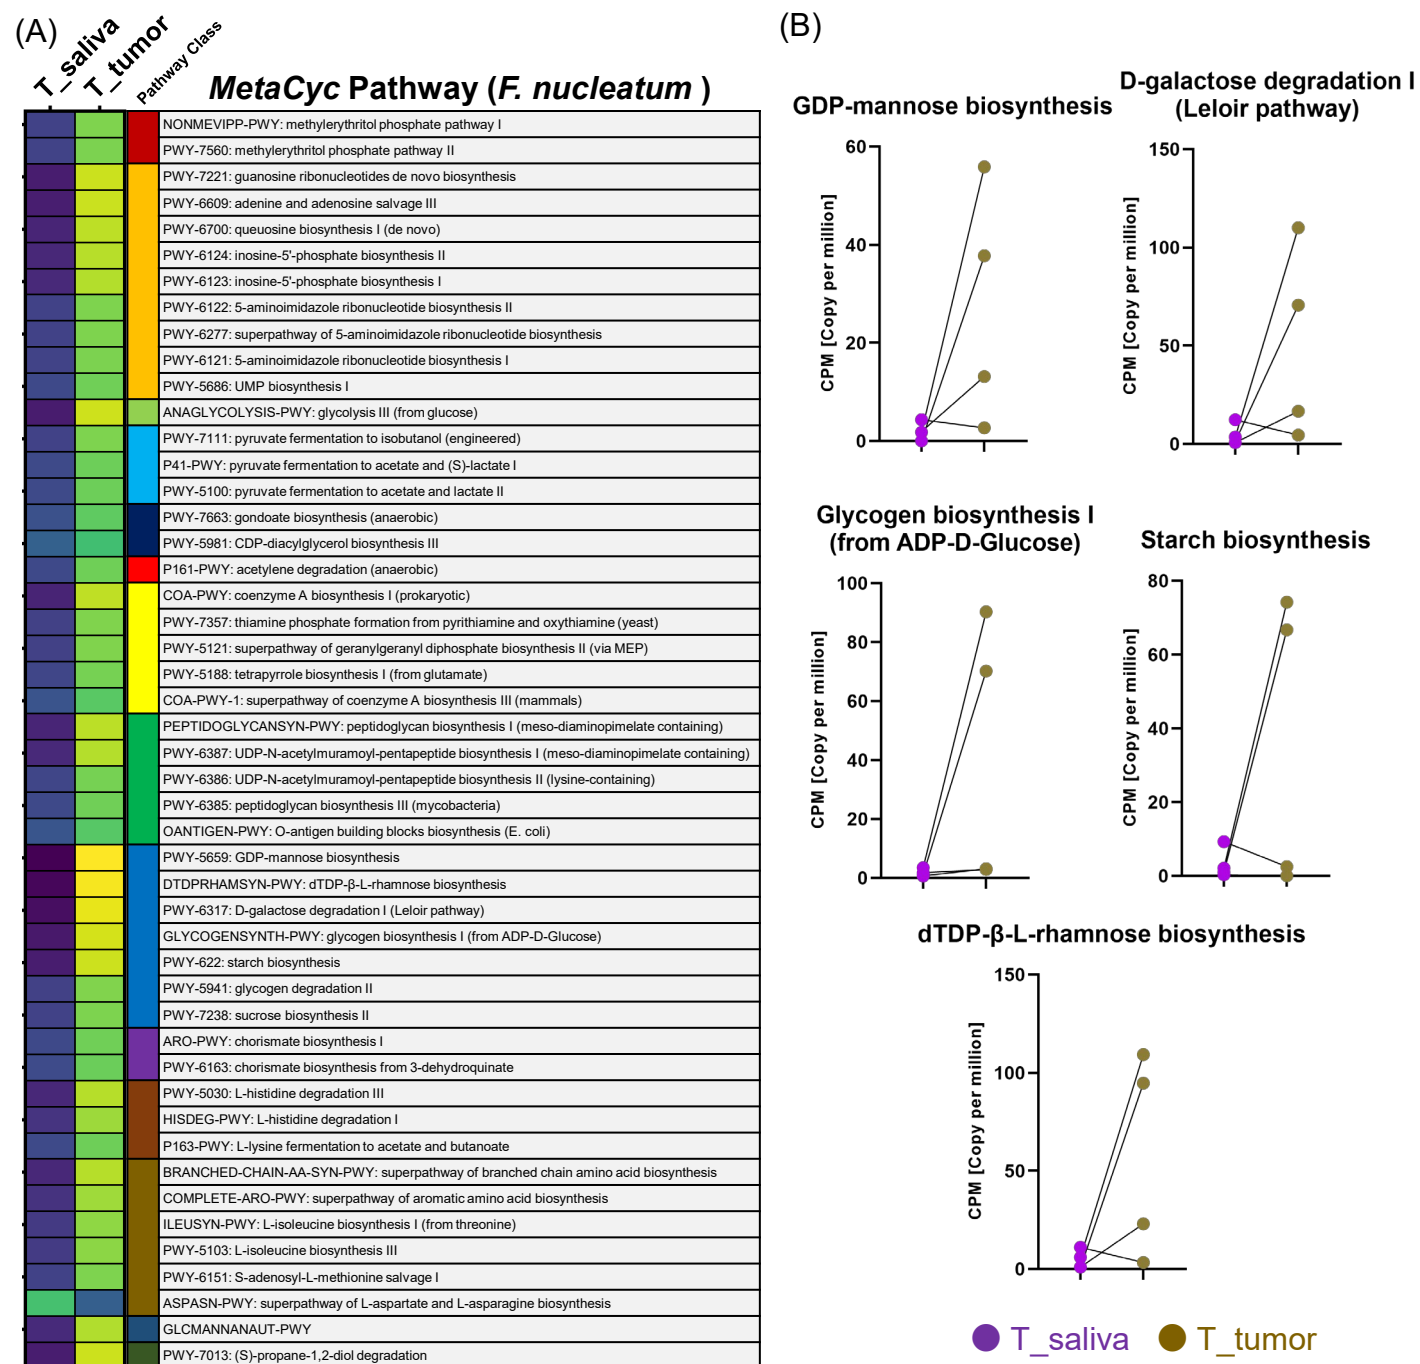

UV

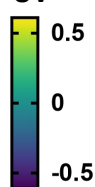

**Pathway Class**

|                                                              |
|--------------------------------------------------------------|
| Secondary Metabolites Biosynthesis                           |
| Nucleosides and Nucleotides Biosynthesis                     |
| Glycolysis                                                   |
| Fermentation                                                 |
| Fatty Acid and Lipid Biosynthesis                            |
| Degradation/Utilization/Assimilation - Other                 |
| Cofactors, Prosthetic Groups, Electron Carriers Biosynthesis |
| Cell Structures Biosynthesis                                 |
| Carbohydrates Degradation                                    |
| Aromatic Compounds Biosynthesis                              |
| Amino Acids Degradation                                      |
| Amino Acids Biosynthesis                                     |
| Amines and Polyamines Degradation Superpathways              |
| Alcohols Degradation                                         |

## Supplemental Figure 4

(A) All microbial pathways of *Fusobacterium nucleatum* associated with saliva and tumors from oral cancer patients were identified with the HUMAnN3 tool, analyzing microbial gene families. Pathway abundances are based on copies per million (CPM), and differences in CPM are displayed using the scaling method of unit variance between the groups. (B) Indicated pathway abundances of *F. nucleatum* in saliva and tumors from the same oral cancer patients are shown.

Supplemental Figure. S5

Fusobacterium nucleatum subsp. polymorphum strain KCOM 1260 (=ChDC F218) genome

Sequence ID: [CP021934.1](#) Length: 2635767 Number of Matches: 5

Range 1: 1706311 to 1707158 [GenBank](#) [Graphics](#)

[▼ Next Match](#) [▲ Previous Match](#)

| Score          | Expect                                                             | Identities   | Gaps      | Strand     |
|----------------|--------------------------------------------------------------------|--------------|-----------|------------|
| 1554 bits(841) | 0.0                                                                | 847/850(99%) | 2/850(0%) | Plus/Minus |
| Query 1        | TCCTAGGATTATGAAAGCTATATGCGCTGTGAGAGAGCTTTGCGTCCCATTAGCTAGTTG       | 60           |           |            |
| Sbjct 1707158  | TCCTAGGATTATGAAAGCTATATGCGCTGTGAGAGAGCTTTGCGTCCCATTAGCTAGTTG       | 1707099      |           |            |
| Query 61       | GAGAGGTAACGGCTCACCAAGGCGATGATGGGTAGCCGGCTGAGAGGGTGATCGGCCAC        | 120          |           |            |
| Sbjct 1707098  | GAGAGGTAACGGCTCACCAAGGCGATGATGGGTAGCCGGCTGAGAGGGTGATCGGCCAC        | 1707039      |           |            |
| Query 121      | AAGGGGACTGAGACACGGCCCTTACTCTACGGGAGGCAGCAGTGGGGAATATTGGACAA        | 180          |           |            |
| Sbjct 1707038  | AAGGGGACTGAGACACGGCCCTTACTCTACGGGAGGCAGCAGTGGGGAATATTGGACAA        | 1706979      |           |            |
| Query 181      | TGGACCAAGAGTCTGATCCAGCAATTCTGTGTGCACGATGAAGTTTTTCGGAATGTAAAG       | 240          |           |            |
| Sbjct 1706978  | TGGACCAAGAGTCTGATCCAGCAATTCTGTGTGCACGATGAAGTTTTTCGGAATGTAAAG       | 1706919      |           |            |
| Query 241      | TGCTTTTCAGTTGGGAAGa a a a a a TGACGGTACCAACAGAGAAGTGAACGGCTAAATACG | 300          |           |            |
| Sbjct 1706918  | TGCTTTTCAGTTGGGAAGAAAAAATGACGGTACCAACAGAGAAGTGAACGGCTAAATACG       | 1706859      |           |            |
| Query 301      | TGCCAGCAGCCGCGGTAATACGTATGTCACAAGCGTTATCCGGATTATTGGGCGTAAAG        | 360          |           |            |
| Sbjct 1706858  | TGCCAGCAGCCGCGGTAATACGTATGTCACAAGCGTTATCCGGATTATTGGGCGTAAAG        | 1706799      |           |            |
| Query 361      | CGCGTCTAGGTGGTTATGTAAGTCTGATGTGAAAATGCAGGGCTCAACTCTGTATTGCGT       | 420          |           |            |
| Sbjct 1706798  | CGCGTCTAGGTGGTTATGTAAGTCTGATGTGAAAATGCAGGGCTCAACTCTGTATTGCGT       | 1706739      |           |            |
| Query 421      | TGGAAACTGTGTAAGTACTGAGAGAGGTAAAGCGGAACACAAGTGTAGAGGTGAAA           | 480          |           |            |
| Sbjct 1706738  | TGGAAACTGTGTAAGTACTGAGAGAGGTAAAGCGGAACACAAGTGTAGAGGTGAAA           | 1706679      |           |            |
| Query 481      | TTCTAGATATTTGTAGGAATGCCGATGGGGAAGCCAGCTTACTGGACAGATACTGACGC        | 540          |           |            |
| Sbjct 1706678  | TTCTAGATATTTGTAGGAATGCCGATGGGGAAGCCAGCTTACTGGACAGATACTGACGC        | 1706619      |           |            |
| Query 541      | TGAAGCGCGAAAGCGTGGGTAGCAAAACAGGATTAGATACCCTGGTAGTCCACGCCGTAAA      | 600          |           |            |
| Sbjct 1706618  | TGAAGCGCGAAAGCGTGGGTAGCAAAACAGGATTAGATACCCTGGTAGTCCACGCCGTAAA      | 1706559      |           |            |
| Query 601      | CGATGATTACTAGGTGTTGGGGGTCGAACCTCAGCGCCCAAGCAACGCGATAAGTAATC        | 660          |           |            |
| Sbjct 1706558  | CGATGATTACTAGGTGTTGGGGGTCGAACCTCAGCGCCCAAGCAACGCGATAAGTAATC        | 1706499      |           |            |
| Query 661      | CGCCTGGGAGTACGTACGCAAGTATGAAACTCAAAGGAATTGACGGGGACCCGCACAAG        | 720          |           |            |
| Sbjct 1706498  | CGCCTGGGAGTACGTACGCAAGTATGAAACTCAAAGGAATTGACGGGGACCCGCACAAG        | 1706439      |           |            |
| Query 721      | CGGTGGAGCATGTGGTTTAATTCGACGCAACGCGAGGAACCTTACCAGCGTTTGACATCT       | 780          |           |            |
| Sbjct 1706438  | CGGTGGAGCATGTGGTTTAATTCGACGCAACGCGAGGAACCTTACCAGCGTTTGACATCT       | 1706379      |           |            |
| Query 781      | TAGGAATGAGACAGANATGTTTCAGTGTCCCTTCGGGGGAAACCTAAAGACAGGTGGTGC       | 840          |           |            |
| Sbjct 1706378  | TAGGAATGAGACAGAGATGTTTCAGTGTCCCTTCGGGGG-AAACCTAAAGACAGGTGGTGC      | 1706320      |           |            |
| Query 841      | ATGGGCTGTC 850                                                     |              |           |            |
| Sbjct 1706319  | ATGG-CTGTC 1706311                                                 |              |           |            |

Supplemental Figure 5  
Isolated *Fn* from oral cancer patient’s saliva was 99% identical to *Fn polymorphum* by BLAST search.

# Supplemental Figure. S6

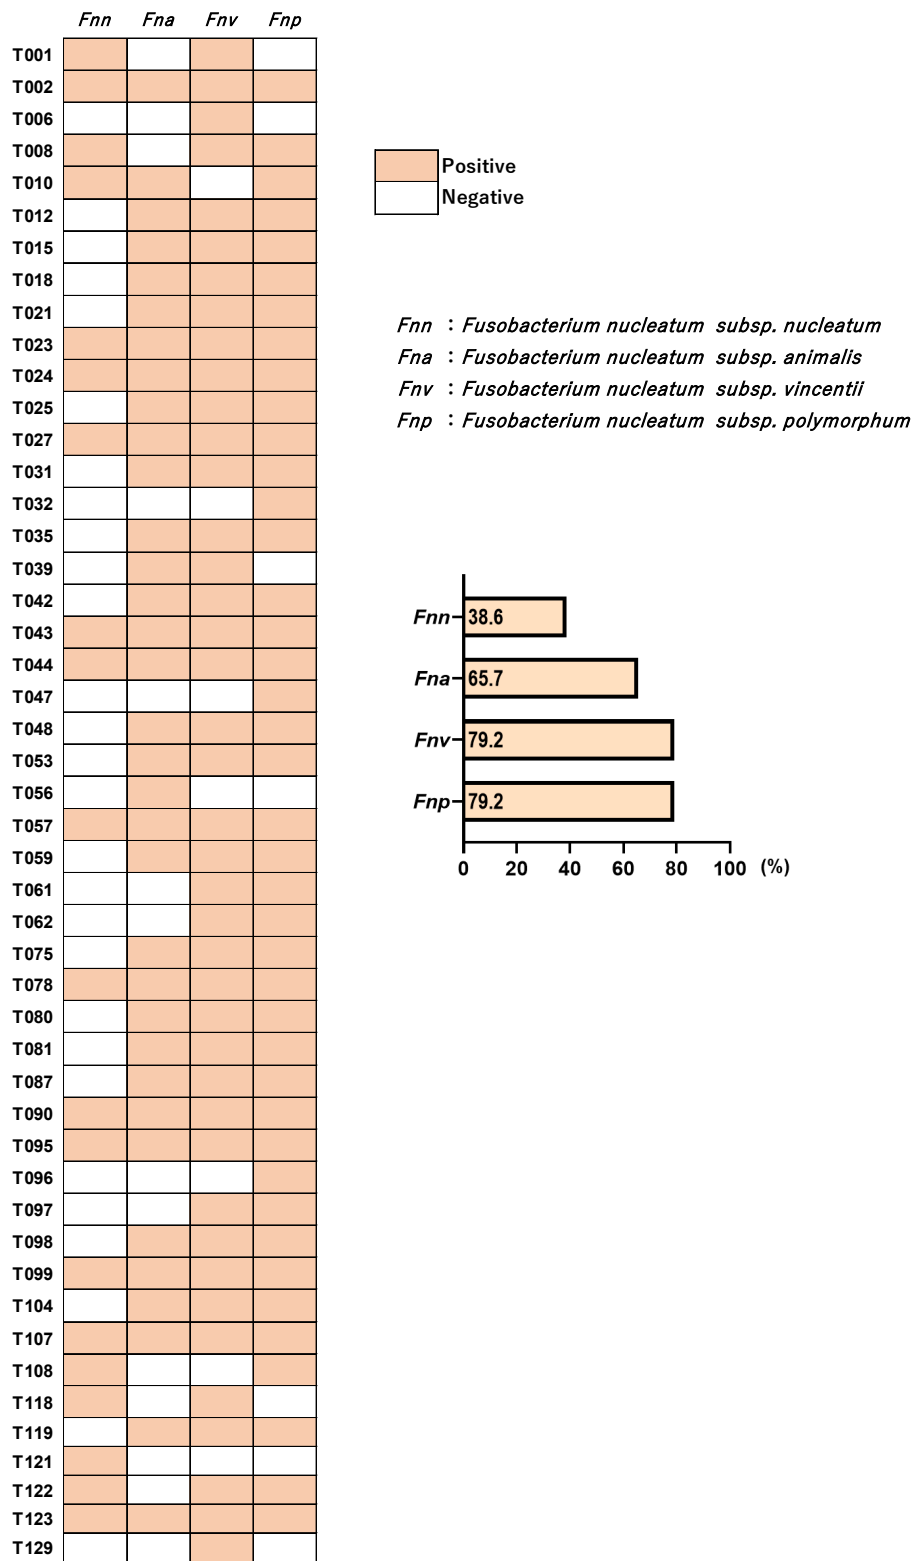

**Supplemental Figure 6**  
The existence of four major *Fn* subspecies in oral cancer patients' saliva is displayed. Orange highlighted squares show the existence of *Fn* subspecies as indicated.
